# Supplementary material for: Emergence and Mechanism of Resistance of Tulathromycin Against Mycoplasma hyopneumoniae in a PK/PD Model and the Fitness Costs of 23S rRNA Mutants
Source: Front Vet Sci. 2022 Feb 11;9:801800. doi: 10.3389/fvets.2022.801800 (PMC8873822; doi:10.3389/fvets.2022.801800)
Supplement: Supplementary file 3 [file Data_Sheet_2.XLSX]

## Sheet: Figure1
Time-concentration	1MIC	2MIC	4MIC	8MIC	16MIC	32MIC	64MIC
0	0.342	0.613	1.286	2.623	4.954	9.962	19.84
6	0.333	0.532	1.38	2.412	4.68	9.376	18.92
9	0.3	0.46	1.074	2.322	4.24	9.08	18.04
12	0.2799	0.446	0.963	2.259	3.76	8.95	16.83
24	0.2331	0.428	0.96	1.98	3.64	7.85	16.72
48	0.1884	0.418	0.852	1.917	3.48	7.35	15.84
72	0.1887	0.394	0.828	1.881	3.32	7.25	15.51
96	0.1605	0.348	0.828	1.836	3.06	4.865	11.99
120	0.1419	0.34	0.774	1.575	2.8	4.71	11.22
144	0.1416	0.314	0.66	1.584	2.38	4.4	10.934
168	0.1407	0.28	0.6	1.278	2.04	3.62	9.76
static Time-kill curve	0MIC	SD	1/2MIC	SD	1MIC	SD	2MIC	SD	4MIC	SD	8MIC	SD	16MIC	SD	32MIC	SD
0	6.1	0.126103	6.02	0.169994	6.06	0.131176	6.06	0.121183	6.02	0.0778146	6.1	0.0576267	6.1	0.0576267	6.1	0.119654
3	6.31	0.174816	5.92	0.157406	5.41	0.236531	5.5	0.100949	5.6	0.106155	5.52	0.0909371	4.85	0.168046	5.18	0.0904602
6	6.38	0.204103	5.91	0.142598	5.17	0.151841	4.6	0.182929	5	0.104566	5	0.0806778	4.62	0.0806778	4.99	0.147781
9	6.26	0.197932	5.49	0.135013	5.2	0.216051	4.74	0.0861741	4.8	0.0722438	5.3	0.173223	4.76	0.173223	4.94	0.145254
12	6.18	0.263301	5.76	0.126499	5.65	0.125931	4.8	0.16041	4.65	0.158449	4.83	0.163069	4.65	0.163069	4.68	0.173042
24	6.21	0.150374	5.66	0.143778	5.56	0.148171	4.3	0.211494	4.81	0.0840721	4.89	0.0330667	3.88	0.0330667	4.33	0.19804
36	6.4	0.21563	5.74	0.101873	4.67	0.139856	3.82	0.196718	2.9	0.112595	2.56	0.117466	2	0.117466	2	0.164245
48	6.67	0.0849987	5.78	0.122191	4.09	0.151965	3.18	0.0657516	2	0.165154	2	0.0951568	2	0.0951568	2	0.130257
dynamic Time-kill curve	0MIC	SD	1MIC	SD	2MIC	SD	4MIC	SD	8MIC	SD	16MIC	SD	32MIC	SD	64MIC	SD
0	7.73327	0.215958	7.90904	0.321431	7.86877	0.165494	7.9177	0.0706193	7.93686	0.260802	7.85098	0.0538582	7.96311	0.0397952	7.88568	0.302584
12	7.56318	0.178351	7.92685	0.157165	7.8351	0.0703822	7.93249	0.315072	7.27724	0.274102	7.86052	0.252688	7.90793	0.214704	7.12489	0.059991
24	7.58722	0.238086	7.88551	0.214208	7.05919	0.10514	7.60953	0.158972	7.50042	0.292123	7.64225	0.0392662	7.82215	0.136491	6.54999	0.11678
36	7.13389	0.102963	7.82484	0.322485	6.73305	0.155835	7.53618	0.284175	7.02794	0.330335	6.74051	0.252278	6.96676	0.340503	6.61681	0.189963
48	7.19394	0.230128	7.79376	0.171448	5.52078	0.229006	7.35325	0.0993538	6.37325	0.0718692	6.49754	0.203526	6.81441	0.459577	4.98867	0.0966179
60	7.58694	0.172359	7.19987	0.322228	5.38588	0.267889	6.00421	0.222913	5.15344	0.30203	6.29957	0.277791	4.85675	0.356308	3.52405	0.283099
72	7.25225	0.0832101	6.0362	0.136523	5.1606	0.163345	4.73429	0.122371	4.60173	0.0613986	4.2751	0.418571	3.96018	0.19456	3.21068	0.272272
84	7.35622	0.0742171	6.60335	0.123977	5.24219	0.0800368	4.81359	0.0710846	5.19364	0.139481	4.94618	0.354185	4.4953	0.0728213	3.61461	0.0381629
96	7.43647	0.185599	6.71684	0.166229	5.4687	0.254987	5.28923	0.324813	5.01358	0.388077	4.70707	0.0334926	4.4255	0.0728213	4.78809	0.374104
108	7.25225	0.28514	6.79291	0.160253	5.58484	0.238109	5.81912	0.345465	5.70629	0.11513	6.69719	0.380162	6.10675	0.0766956	5.55449	0.23442
120	7.25622	0.19331	6.40775	0.0895335	6.20575	0.0657133	6.33463	0.228933	6.18422	0.0795684	6.82998	0.357159	6.37422	0.332286	6.12777	0.409292
132	7.21647	0.0967615	6.63838	0.263572	6.48893	0.183703	6.38384	0.257235	6.70976	0.132606	6.82962	0.211806	6.38677	0.100332	6.23017	0.263662
144	7.25279	0.290997	6.70856	0.158487	6.80648	0.150997	6.554	0.272821	6.62032	0.346208	6.93841	0.14295	6.40018	0.302747	6.20425	0.0725725
156	6.99586	0.198043	6.86073	0.314526	6.74064	0.117129	6.63062	0.0783788	6.74909	0.0538629	6.88734	0.201994	6.40813	0.0755769	6.43337	0.292933
168	7.21944	0.216432	6.76436	0.275953	6.79159	0.214919	6.70587	0.0962486	6.53904	0.0648862	6.80606	0.296829	6.15599	0.0491575	6.56194	0.31321
	number of mutants	1m	2m	4m	8m	16m	32m	64m
	12	0	0	0	0	0	5	6
	36	0	0	0	0	2	7	9
	60	0	0	1	6	8	10	10
	84	1	0	9	10	10	10	10
	108	5	6	10	10	10	10	10
	132	10	10	10	10	10	10	10
	156	10	10	10	10	10	10	10

## Sheet: Figure2
0M	Total	SD	Drug-resistance	SD	1M	Total	SD	Drug-resistant	SD	2M	Total	SD	Drug-resistant	SD	4M	Total	SD	Drug-resistant	SD
12	7.56318	0.178351	2.30103	0.158351	12	7.92685	0.157165	3.04139	0.137727	12	7.8351	0.0703822	3.00689	0.234158	12	7.93249	0.315072	3.04003	0.199784
24	7.58722	0.238086	2.727	0.208086	24	7.88551	0.214208	2.95424	0.0875066	24	7.05919	0.10514	2.97815	0.239227	24	7.60953	0.158972	3.01265	0.100358
36	7.13389	0.102963	2.66901	0.142358	36	7.82484	0.322485	3.29666	0.0840279	36	6.73305	0.155835	3.13545	0.211712	36	7.53618	0.284175	2.99255	0.181855
48	7.19394	0.230128	2.56427	0.201281	48	7.79376	0.171448	3.43933	0.127197	48	5.52078	0.229006	3.0607	0.167915	48	7.35325	0.0993538	3.11394	0.151119
60	7.58694	0.172359	2.47712	0.16	60	7.19987	0.322228	3.85733	0.164891	60	5.38588	0.267889	3.51402	0.174829	60	6.00421	0.222913	3.62839	0.100911
72	7.25225	0.0832101	2.54407	0.06	72	6.0362	0.136523	4.27091	0.393995	72	5.1606	0.163345	3.9311	0.0545725	72	4.73429	0.122371	3.70893	0.282504
84	7.35622	0.0742171	2.69897	0.0742171	84	6.60335	0.123977	4.2388	0.0649794	84	5.24219	0.0800368	3.72697	0.10439	84	4.81359	0.0710846	3.71315	0.101682
96	7.43647	0.185599	2.75333	0.1	96	6.71684	0.166229	4.1588	0.0855018	96	5.4687	0.254987	3.75328	0.141886	96	5.28923	0.324813	3.69897	0.250764
108	7.25225	0.28514	2.82391	0.0818765	108	6.79291	0.160253	4.0141	0.174768	108	5.58484	0.238109	4.18563	0.274406	108	5.81912	0.345465	3.92428	0.130161
120	7.25622	0.19331	2.63682	0.239546	120	6.40775	0.0895335	3.95424	0.0803045	120	6.20575	0.0657133	4.04139	0.175507	120	6.33463	0.228933	4.41774	0.290884
132	7.21647	0.0967615	2.52288	0.0254793	132	6.63838	0.263572	3.97772	0.137141	132	6.48893	0.183703	4.35538	0.203809	132	6.38384	0.257235	4.8239	0.120748
144	7.25279	0.290997	2.69897	0.3	144	6.70856	0.158487	4.79588	0.184965	144	6.80648	0.150997	4.70472	0.0177146	144	6.554	0.272821	5.50965	0.104715
156	6.99586	0.198043	2.77815	0.231025	156	6.86073	0.314526	5.29003	0.134962	156	6.74064	0.117129	5.25527	0.218769	156	6.63062	0.0783788	5.66276	0.126375
168	7.21944	0.216432	2.92082	0.198432	168	6.76436	0.275953	5.36173	0.14538	168	6.79159	0.214919	5.42488	0.114586	168	6.70587	0.0962486	5.64098	0.0611922
8M	Total	SD	Drug-resistant	SD	16M	Total	SD	Drug-resistant	SD	32M	Total	SD	Drug-resistant	SD	64M	Total	SD	Drug-resistant	SD
12	7.27724	0.274102	2.8014	0.187621	12	7.86052	0.252688	3.26951	0.310019	12	7.90793	0.214704	2.90103	0	12	7.12489	0.059991	3.06707	0.270747
24	7.50042	0.292123	2.94596	0.231711	24	7.64225	0.0392662	2.96237	0.227543	24	7.82215	0.136491	2.94874	0.0696181	24	6.54999	0.11678	3.15625	0.0585113
36	7.02794	0.330335	3.52375	0.171048	36	6.74051	0.252278	3.28328	0.164356	36	6.96676	0.340503	3.16875	0.248702	36	6.61681	0.189963	3.25115	0.252907
48	6.37325	0.0718692	3.71875	0.191368	48	6.49754	0.203526	3.82393	0.17809	48	6.81441	0.459577	3.41842	0.0830102	48	4.98867	0.0966179	3.05154	0.029832
60	5.15344	0.30203	3.19866	0.241888	60	6.29957	0.277791	3.69897	0	60	4.85675	0.356308	3.17284	0.106021	60	3.52405	0.283099	3.02531	0.132454
72	4.60173	0.0613986	3.18184	0.0840347	72	4.2751	0.418571	3.93802	0.381273	72	3.96018	0.19456	3.30773	0.30115	72	3.21068	0.272272	2.88479	0.279315
84	5.19364	0.139481	3.88081	0.372263	84	4.94618	0.354185	4.0141	0.267114	84	4.4953	0.0728213	3.43215	0.188324	84	3.61461	0.0381629	3.30535	0.169143
96	5.01358	0.388077	3.69897	0.0720103	96	4.70707	0.0334926	4.29739	0.184576	96	4.4255	0.0728213	4.51818	0.178602	96	4.78809	0.374104	4.25527	0.0953235
108	5.70629	0.11513	3.47712	0.127413	108	6.69719	0.380162	4.30103	0.0105947	108	6.10675	0.0766956	5.23278	0.22727	108	5.55449	0.23442	5.34889	0.484725
120	6.18422	0.0795684	4.69897	0.151282	120	6.82998	0.357159	5.39794	0.0567455	120	6.37422	0.332286	5.55925	0.0864436	120	6.12777	0.409292	6.11394	0.204483
132	6.70976	0.132606	5.75333	0.102501	132	6.82962	0.211806	5.90309	0.171555	132	6.38677	0.100332	5.78564	0.1243	132	6.23017	0.263662	6.32736	0.135714
144	6.62032	0.346208	5.92942	0.0255763	144	6.93841	0.14295	6.07918	0.0296273	144	6.40018	0.302747	6.23856	0.0624694	144	6.20425	0.0725725	6.20412	0.183664
156	6.74909	0.0538629	5.72016	0.314339	156	6.88734	0.201994	5.77815	0	156	6.40813	0.0755769	6.0768	0.35561	156	6.43337	0.292933	6.39217	0.143387
168	6.53904	0.0648862	5.63682	0.252748	168	6.80606	0.296829	6	0.0228787	168	6.15599	0.0491575	6.62423	0.0461534	168	6.56194	0.31321	6.5563	0.0197228
MTIL1	Control	SD	5ug/mL	SD	20ug/mL	SD	MTIL2	Control	SD	5ug/mL	SD	20ug/mL	SD
0	5.89445	0.0768838	5.85487	0.0464628	5.78422	0.124053	0	5.70806	0.153141	5.78636	0.0863524	5.69614	0.0855751
24	6.07617	0.111582	6.13743	0.166873	5.75396	0.10298	24	6.26979	0.188232	6.1913	0.122846	5.70176	0.0777192
48	6.85692	0.0131356	6.78414	0.0320778	5.98428	0.0678813	48	6.61598	0.113383	6.41342	0.154608	5.61732	0.148141
72	8.30559	0.0397343	8.08245	0.0482313	6.13599	0.193544	72	8.18947	0.0473477	7.9979	0.121119	5.3249	0.184802
96	8.03167	0.0427052	8.03887	0.111663	6.78217	0.180671	96	8.01411	0.124878	8.08681	0.113172	5.78662	0.13534
MTIL3	Control	SD	5ug/mL	SD	20ug/mL	SD	ATCC25934	Control	SD	5ug/mL	SD	20ug/mL	SD
0	5.85497	0.0842585	5.84872	0.0810925	5.81242	0.0708172	0	5.77989	0.110529	5.65053	0.165037	5.79747	0.127664
24	6.32967	0.264679	6.19761	0.0686751	5.68973	0.207381	24	6.14585	0.107656	6.35208	0.1673	5.95621	0.0765049
48	6.71611	0.296791	6.67857	0.133406	5.98564	0.082548	48	7.13166	0.0404826	7.04672	0.0755535	6.09038	0.0334735
72	8.32966	0.254375	8.20538	0.0261947	5.81858	0.189503	72	8.14231	0.0212894	7.99456	0.178853	6.51687	0.250982
96	8.24862	0.0309269	8.23226	0.0657997	7.09562	0.051907	96	8.02197	0.0235761	8.11692	0.0734827	7.15796	0.0893564

## Sheet: Figure3
	log2FoldChange	-LOG10P	ident	Gene		log2FoldChange	-LOG10P	ident	Gene		log2FoldChange	-LOG10P	ident	Gene
	1.41362	1.88606	Til1	865		1.15029	1.22185	Til2	865		1.30538	1.01323	Til3	865
	0.37379	0.66154	Til1	10		0.90187	1.79588	Til2	10		1.10406	1.3098	Til3	10
	1.1633	1.82391	Til1	95		0.71079	0.88273	Til2	95		0.89186	0.97062	Til3	95
	0.26882	1.25181	Til1	1135		0.42958	1.52288	Til2	1135		1.3557	3	Til3	1135
	0.7512	1.52288	Til1	1935		0.50055	2.52288	Til2	1935		0.84671	1.4318	Til3	1935
	0.63531	3	Til1	2670		0.79919	1.95861	Til2	2670		1.46008	3	Til3	2670
	1.57087	2	Til1	90		1.30605	3	Til2	90		0.85901	0.78252	Til3	90
	-0.45517	1.3279	Til1	85		-0.35269	1.05061	Til2	85		-0.76437	3	Til3	85
	0.67671	1.30103	Til1	1115		0.14031	1.79588	Til2	1115		0.41958	1.49485	Til3	1115
	0.11227	0.48812	Til1	3315		0.94987	1.4318	Til2	3315		0.52605	2.30103	Til3	3315
	0.37155	0.82681	Til1	1610		0.42612	2.72428	Til2	1610		-0.03423	0.05159	Til3	1610
	-0.63499	1.92082	Til1	2665		-0.63669	1.92082	Til2	2665		0.19331	0.74473	Til3	2665
	0.44623	0.44612	Til1	1130		-0.43122	1.92082	Til2	1130		0.42651	0.70553	Til3	1130
	-0.60415	2	Til1	1615		-0.74572	3	Til2	1615		-0.75971	2.30103	Til3	1615
	-0.87186	2.04576	Til1	1655		-1.21499	3	Til2	1655		-0.78499	3	Til3	1655
	-1.1488	2.52288	Til1	1230		-0.56945	3	Til2	1230		-0.0488	0.16813	Til3	1230
	0.11958	0.64782	Til1	2500		0.19014	2.39794	Til2	2500		0.33559	1.01323	Til3	2500
	-0.60654	2.22185	Til1	3225		-0.73187	2.52288	Til2	3225		0.25014	2.52288	Til3	3225
	-0.55945	3	Til1	1805		-1.12752	2.39794	Til2	1805		-0.50499	3	Til3	1805
	-1.35502	3	Til1	1660		-1.92001	3	Til2	1660		-1.01222	2.52288	Til3	1660
	0.79585	1.82391	Til1	1970		0.25813	1.30103	Til2	1970		1.30227	2.04576	Til3	1970
	0.80387	0.81531	Til1	1140		1.62208	2.52288	Til2	1140		0.70591	1.58503	Til3	1140
	0.11643	0.19112	Til1	1145		1.0695	1.72125	Til2	1145		0.01925	0.05849	Til3	1145
	0.56255	1.76955	Til1	2020		0.50803	1.65758	Til2	2020		0.56609	0.91721	Til3	2020
	1.81642	2.39794	Til1	2395		1.89573	1.69897	Til2	2395		1.41662	2.22185	Til3	2395
	0.62131	1.22915	Til1	2400		0.51044	0.79588	Til2	2400		0.28511	1.00877	Til3	2400
	-1.05335	1.69897	Til1	2280		-0.62644	1.72125	Til2	2280		-1.4828	2.52288	Til3	2280
	0.56751	2.30103	Til1	2885		0.29515	0.65561	Til2	2885		0.15071	1.33724	Til3	2885
	-0.30698	0.99568	Til1	2660		-1.43487	3	Til2	2660		-0.65909	1.25964	Til3	2660
	-0.23314	0.91721	Til1	3215		-0.86254	1.33724	Til2	3215		0.15318	0.57349	Til3	3215
	0.57581	0.81816	Til1	3230		-0.91617	1.60206	Til2	3230		0.9027	1.42022	Til3	3230
	0.58019	1.37675	Til1	2040		1.08667	1.0655	Til2	2040		-0.19949	0.55752	Til3	2040
	0.98457	1.92082	Til1	2675		1.87133	2.22185	Til2	2675		0.52614	0.75696	Til3	2675
	1.12524	1.01773	Til1	3330		1.21582	1.65758	Til2	3330		1.07359	2.04576	Til3	3330
	1.13647	1.95861	Til1	MATE		1.39738	1.74473	Til2	MATE		1.501	1.82391	Til3	MATE

## Sheet: Figure4
co-cultured	ATCC25934	SD	MTUL1	SD	MTUL2	SD	cultured seperately	ATCC25934	SD	MTUL1	SD	MTUL2	SD
0	3.52064	0.127067	3.44166	0.0942204	3.46389	0.134369	0	3.38263	0.206468	2.99222	0.0837376	3.33717	0.147487
12							12	3.23778	0.155042	3.2297	0.127115	3.11148	0.106688
24	3.40579	0.0255765	3.43313	0.063513	3.27061	0.135171	24	3.82588	0.213626	3.75784	0.094372	3.6719	0.144384
36	3.45538	0.0609315	3.26804	0.0725615	3.33952	0.1357	36	4.79843	0.0951942	4.46317	0.113341	4.73483	0.162611
48	4.38907	0.257663	3.83725	0.135134	4.46336	0.165897	48	4.66931	0.152545	4.54238	0.112794	4.64524	0.355248
60	5.43462	0.015496	4.76152	0.109688	5.13107	0.263884	60	5.48723	0.0985017	5.35529	0.00910094	5.56609	0.129742
72	5.74216	0.209828	5.06598	0.155882	5.75359	0.123724	72	6.43978	0.120627	6.23315	0.0362689	6.45114	0.0835697
84	6.37946	0.0519005	5.53287	0.1997	6.24977	0.0696179	84	6.22477	0.19426	6.22835	0.178387	6.66377	0.0567207
96	6.82683	0.123537	6.32024	0.041487	6.81015	0.0849665	96	7.53494	0.0258572	6.99692	0.148787	7.48567	0.225772
120	7.71035	0.052334	7.09656	0.0173815	7.44959	0.0754027	120	8.07221	0.138575	7.84147	0.115078	8.00213	0.0715716
144					7.75005	0.121188	132	7.9965	0.082684	8.1417	0.0339228	8.29455	0.0499078
168	7.67513	0.205306	6.56041	0.0986401	7.49504	0.278433	144	8.34932	0.0642493	7.74177	0.102501	8.40353	0.0727441
							156	7.84302	0.146337	8.12528	0.093203	8.24413	0.051611
							168	8.00343	0.283814	7.6831	0.239156	8.21965	0.0433272
co-cultured	ATCC25934	SD	MTIA1	SD	MTIA2	SD	cultured seperately	ATCC25934	SD	MTIA1	SD	MTIA2	SD
0	3.23145	0.117505	3.20538	0.147984	3.47885	0.0842412	0	3.38263	0.206468	2.99895	0.250433	3.42434	0.285877
12	3.40354	0.13637	3.15537	0.0292968	3.29576	0.105031	12	3.23778	0.155042	3.22421	0.233035	3.53425	0.0189553
24	3.42713	0.020025	2.87849	0.0739627	3.19191	0.150515	24	3.81264	0.231757	3.66937	0.0984908	3.73249	0.0505858
36	4.0246	0.196375	3.28541	0.0277339	3.74954	0.0749519	36	4.80694	0.102175	3.96549	0.140812	4.0247	0.116928
48	4.4684	0.021555	3.04139	0	3.90122	0.0505767	48	4.67448	0.166623	4.49531	0.0925935	4.85996	0.0291432
60	4.78918	0	4.25081	0.107424			60	5.49524	0.106102	5.02769	0.0811533	5.02651	0.106932
72	5.16089	0.0663065	4.73545	0.195528	4.51999	0.105391	72	6.48691	0.0642837	5.20212	0.105345	5.35316	0.143495
84	5.52293	0.488501	5.08976	0.0342009	4.74784	0.0749572	84	6.22477	0.19426	5.69787	0.0818928	6.03573	0.0591135
96	6.22011	0	4.93985	0.115579			96	7.53494	0.0258572	6.7439	0.0859068	6.79053	0.0712618
120	7.27303	0.222518	6.65728	0.0702573	6.59362	0.162255	108			6.99138	0.0542857	7.088	0.0107849
144	7.98813	0.0411865	7.09056	0.166648	6.93495	0.0836263	120	8.07221	0.138575	7.38293	0.0632319	7.57778	0.119279
168	8.20507	0.014972	7.54607	0.163367	6.50701	0.0358034	132	7.9965	0.082684	7.60249	0.0821892	7.83762	0.0578487
							144	8.34932	0.0642493	7.89141	0.0244922	7.95081	0.0937422
							156	7.84302	0.146337	8.27621	0.0247908	8.29357	0.0619806
							168	8.00343	0.283814	8.1837	0.0820425	8.11855	0.0284102
co-cultured	ATCC25934	SD	MTil1	SD	MTil2	SD	MTil3	SD	cultured seperately	ATCC25934	SD	Til1	SD	Til2	SD	Til3	SD
0	3.48585	0	3.31175	0	3.30103	0.162816	3.55218	0.0624694	0	3.11394	0.162816	2.39794	0.1372	2.77815	0.355071	3.24304	0.199784
12	3.2592	0	3.39794	0.048455	3.17609	0.141907	3.18554	0.10206	12	3.35218	0.122904	2.92942	0.216337	3.22531	0.247306	3.6744	0.100358
24	3.74857	0.073064	3.09691	0.0706646	3.51188	0.16602	3.63849	0.028996	24	3.43136	0.144709	4.21617	0.167287	4.19728	0.104087	4.5682	0.181855
36	3.87552	0.0334734	3.60477	0.0545722		0.194046			36	4.63849	0.182414	5.08099	0.0373563	4.28623	0.215109	4.92583	0.151119
48	4.37843	0.0880456	4.15685	0.113622	4.15634	0.0992309	4.15381	0.0255763	42	5	0.0992309	4.91908		4.71037		5.10278	0.100911
60	4.60505	0.14232	4.61278	0.106708	4.64014	0.333167	4.87506	0.15871	48	4.30103	0.0930636	5.26482	0.381273	5.0899	0.272034	5.58737	0.282504
72	4.9431	0.0880456	4.83251	0	4.85934	0.102501	4.8921	0.0880456	60	5.60206	0.114569	5.73504	0.267114	5.68726	0.30103	6.30103	0.101682
84	5.84383	0.272034	5.85532	0.127636	5.6902	0.187591	5.73772	0.19897	72	5.95424	0.233683	6	0.214825	5.34242	0.139902	5.97772	0.250764
108	6.4849	0.0334734	6.63849	0	6.54096	0.133892	6.53782	0.0334734	84	6.58546	0.133892	6.64345	0.0105947	6.11727		6.80956	0.130161
144	7.04019	0.263404	7.10927	0.26574	6.84042	0.270368	7.71809	0.0188943	96		0.0963985	6.01284	0.0654809	6.2041	0.0167119	6.95182	0.290884
156	7.38362	0.048455	7.54158	0.0545722	7.05023	0.0273377	7.87506	0.073064	120	7.45864	0.028996	7.50853	0.196997	7.0413	0.141907	7.63094	0.0998958
168	7.49332	0.0167119	7.83091	0.140862	7.31527	0.0330834	7.91062	0.0851309	144	7.78887	0.073659	7.94116	0.0296273	7.8603	0.017381	7.87795	0.0167119
180	7.63938	0.0412674	7.88124	0.208768	7.3902	0.0964617	7.95904	0.0157042
competition-test	MTUL1	MTUL2	MTIL1	MTIL2	MTIL3	MTIA1	MTIA2
	0.720962	0.923162	1.18902	1.14682	1.13698	0.895432	0.607381
	0.71283	0.782265	0.953795	0.993715	0.968623	0.878101	0.578205
	0.788514	1.06825	1.05261	1.10745	1.08353	0.830638	0.644696
	0.783201	1.02481	1.00445	1.00654	0.989432	0.83327	0.586448
	0.723771	0.916735	0.904115	0.957569	0.95224	0.884309	0.615824
	0.724524	0.961079	1.05983	1.07008	1.0717	0.854033	0.60728
